# Supplementary material
Source: PubMed Central journal article supplement (PMC4243338)
Supplement: ASN.2012080823_ASN2012080823SupplementaryData.pdf [file ASN.2012080823_ASN2012080823SupplementaryData.pdf]

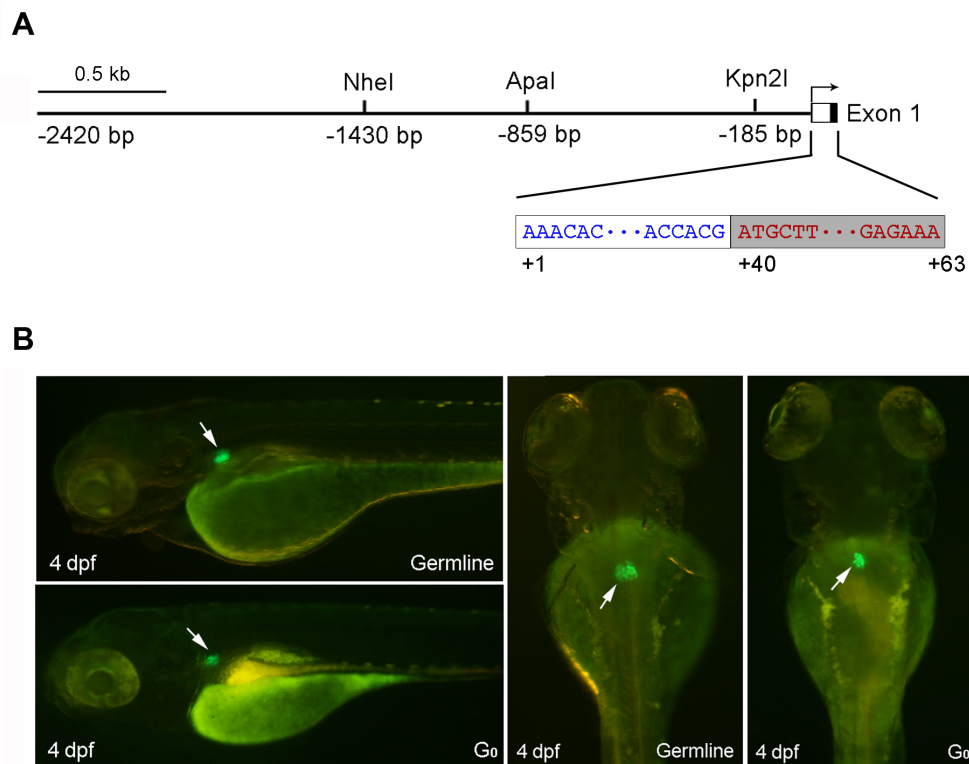

**Figure S1.** GFP expression driven by the 2.5 kb zebrafish *nphs2* promoter fragment in injected ( $G_0$ ) and germline ( $G_1$ ) embryos. (A) Genomic structure of the promoter fragment used for GFP expression. The UTR in blue color and the coding region in red color are indicated with frames. (B) Comparison of GFP expression between  $G_0$  embryos and  $G_1$  embryos from germline fish at 4 dpf. The pronephric glomerulus is indicated with arrows.

**Table S1.** DNA sequence analysis of the 5-kb *Nphs2* promoter fragment upstream of the transcription start site in different species

| Species                  | Potential motif sequence           |
|--------------------------|------------------------------------|
| <b>Primates</b>          |                                    |
| Bushbaby                 | TAATTAcatatcAAAAATA                |
| Human                    | TTAATAAagaccCTAAATA                |
| Gibbon                   | TTAATAAagaccCTAAATA                |
| Gorilla                  | TTAATAAagaccCTAAATA                |
| Macaque                  | TTAATAAagaccgCTAAATA               |
| Marmoset                 | TTAATAAagaccCTAAATA                |
| Orangutan                | TTAATAAagaccCTAAATA                |
| <b>Rodents</b>           |                                    |
| Guinea Pig               | TGTTTATtctggaaaaaaaaactcaaaTTATTAA |
| Mouse                    | TATTTGTgtctggTAATTA                |
| Rabbit                   | TAATTAcagaggaatctaaaaGAAAACA       |
| Rat                      | TATTTGTtatccggTAATTA               |
| Squirrel                 | TAATTActgtattCCCAACA               |
| <b>Placental mammals</b> |                                    |
| Cow                      | TATTCAGtgagaaaTTATTAA              |
| Dog                      | TAATTAaacatGGCAATA                 |
| Dolphin                  | TAATTAtgTTAAATA                    |
| Ferret                   | TAATTAaacatGGTAATA                 |
| Horse                    | TATTGCTaatcttcTAATTA               |
| Megabat                  | No                                 |
| Microbat                 | TGTTTCATatcctTAATTA                |
| Opossum                  | TATTTATttttTAATTA                  |
| Pig                      | TATTACTaatcattTAATTA               |
| Tasmanian devil          | TTAATAAAttcggcTGAAACA              |
| <b>Sauropsida</b>        |                                    |
| Anole lizard             | TGTTTTCatctcagGTATTAA              |
| Chicken                  | No                                 |
| <b>Fish</b>              |                                    |
| Coelacanth               | TATTTAAatattcTTATTAA               |
| Fugu                     | TTAAGAAttaagatgaaACCAATA           |
| Medaka                   | TAATTAttttAACAAATA                 |
| Platyfish                | TAATTAtgaaaatGCAAATA               |
| Stickleback              | TATTTTGacattTTCTTAA                |
| Tetraodon                | No                                 |
| Zebrafish                | TAATTAGAagagtATAAACA               |

Of note, only complete DNA sequence within 5 kb was included for analysis.

FLAT-E/F binding consensus: TAATTA/TTAAKAM

Forkhead binding consensus: RYMAAYA

(K=G/T; M=A/C; R=A/G; Y=C/T)

**Table S2.** Sequences of primers used for cloning, mutagenesis and qPCR

---

zfin\_nphs2prom-5: 5'-GGTGATTCTATGCTCTTTGCGCTTTGT  
zfin\_nphs2prom-3: 5'-TTTCTCTATCTCCGCAGGAAGCATCGT

zp0.1k\_finemap-5: 5'-GGTGTTCCTTCTGTGGAAAG  
zfin\_nphs2prom-3: 5'-TTTCTCTATCTCCGCAGGAAGCATCGT

zp0.2\_lmxmut-5: 5'-TTCTGTGGAAAGTTACTTAGAAGAGTATAAACACTCCCAC  
zp0.2\_lmxmut-3: 5'-GTGGGAGTGTTATACTCTTCTAAGTAACTTTCCACAGAA

zp\_motif-5: 5'-CGGAAGACTAGTCAGGAAAG  
zp\_motif-3: 5'-TGTGGGAGTGTTTATACTCT

zp\_motif-5: 5'-CGGAAGACTAGTCAGGAAAG  
zp\_motif\_del-3: 5'-ACTCTTCTAATTA ACTTTCCAC

zp0.2\_foxmut-5: 5'-ATTAGAAGAGTATAGACACTCCCACATTATCAAATAAATC  
zp0.2\_foxmut-3: 5'-GATTTATTTGATAATGTGGGAGTGCTATACTCTTCTAAT

GFP\_qPCR-5: 5'-ACCACTACCTGAGCACCCAGTC  
GFP\_qPCR-3: 5'-GTCCATGCCGAGAGTGATCC

zbactin\_qPCR-5: 5'-CGAGCAGGAGATGGGAACC  
zbactin\_qPCR-3: 5'-CAACGGAAACGCTCATTGC

zpodocin\_qPCR-5: 5'-CGAGAGATACTGGCCCATCA  
zpodocin\_qPCR-3: 5'-CCACTTTAATACCCACCTG

zlmx1b1\_qPCR-5: 5'-CCGGGAGAGGAACTTTACT  
zlmx1b1\_qPCR-3: 5'-ATGGTAAACACACTCCAGCG

zfoxc1a\_qPCR-5: 5'-GAGGACCGAGGTGTTAAAGA  
zfoxc1a\_qPCR-3: 5'-TAATGTCCTGAATGCGCACG

hp\_motif-5: 5'-CCCAACTCCTGCTTTCATCA  
hp\_motif-3: 5'-CTCTCTTTGCGATGTGTTTC

zfoxc1a\_cDNA\_AgeI-5: 5'-ACCGGTCGCCACCATGCAGGCGCGCTATTCCGT  
zfoxc1a\_cDNA\_ClaI-3: 5'-ATCGATGGTTTGGTCAAATTTGCTGCAGTCA

zlmx1b1\_cDNA\_AgeI-5: 5'-ACCGGTCGCCACCATGTTGGACGGTATAAAAATCG  
zlmx1b1\_cDNA\_ClaI-3: 5'-ATCGATTTTCATGAGGCGAAATAGGAGCTCTG

hccnc\_motif-5: 5'-GGTCTCCACCTACAATGTGA  
hccnc\_motif-3: 5'-GAGCAGCGGAATCAACAGTT

hmeis2\_motif-5: 5'-TTATGCACATATTTATCCCTCTAA  
hmeis2\_motif\_BamHI-3: 3'-GGATCCCACTCTCCTCTTGTAAGCG

zccnc splicing-5: 5'-CTTCTGGCAGAGTTCACATT  
zccnc splicing-3: 5'-CGTTTACTATTCTCCAAGCC

---

**Table S3.** Sequences of oligonucleotide probes used for EMSA

---

Zebrafish

|                       |                                                                  |
|-----------------------|------------------------------------------------------------------|
| zfin podocin WT:      | 5'CTAGTGTGGAAAGTTAATTAGAAGAGTATAAACACTCCCACATT                   |
| zfin podocin mutLmx1: | 5'CTAGTGTGGAAAGTTA <b>c</b> TTAGAAGAGTATAAACACTCCCACATT          |
| zfin podocin mutFox:  | 5'CTAGTGTGGAAAGTTAATTAGAAGAGTATA <b>g</b> ACACTCCCACATT          |
| zfin podocin mutAll:  | 5'CTAGTGTGGAAAGTTA <b>c</b> TTAGAAGAGTATA <b>g</b> ACACTCCCACATT |

Human

|                        |                                                                  |
|------------------------|------------------------------------------------------------------|
| human podocin WT:      | 5'CTAGGGCATAAGCATTAAATAAAGACCCTAAATAATAACAGAGAC                  |
| human podocin mutLmx1: | 5'CTAGGGCATAAGCATT <b>ggTg</b> AAGACCCTAAATAATAACAGAGAC          |
| human podocin mutFox:  | 5'CTAGGGCATAAGCATTAAATAAAGACCCT <b>aggTg</b> ATGACAGAGAC         |
| human podocin mutAll:  | 5'CTAGGGCATAAGCATT <b>ggTg</b> AAGACCCT <b>aggTg</b> ATGACAGAGAC |

---

All probes have CTAG tails at the 5' end for labeling purposes. Mutants are marked in bold and lower case.

**Table S4.** Sequences of morpholino antisense oligos (MOs) used for zebrafish gene knockdown

---

Control-MO: 5' - CCTCTTACCTCAGTTACAATTTATA ([www.gene-tools.com](http://www.gene-tools.com))

ATG-*lmx1b1*-MO: 5' - CTTCGATTTTTATACCGTCCAACAT (ref. 29)

ATG-*lmx1b2*-MO: 5' - CCTCAATTTTGATTCCGTCCAGCAT (ref. 29)

Mismatch ATG-*lmx1b1*-MO: 5' - CaTCcATTTTaATcCCGTCCAcCAT (ref. 29)

ATG-*foxc1a*-MO: 5' - CCTGCATGACTGCTCTCCAAAACGG (ref. 28)

ATG-*foxc1b*-MO: 5' - GCATCGTACCCCTTTCTTCGGTACA (ref. 28)

ATG-*ccnc*-MO: 5' -AACTCTGCCAGAAGTTCCCTGCCAT

E3I3-*ccnc*-MO: 5' -ACGGCACTGCACTGCTCACCTGGCA

---
